# Supplementary material for: The Metabolic Syndrome Is a Risk Indicator of Microvascular and Macrovascular Complications in Diabetes
Source: Oxford University Press journal article supplement (doi:10.2337/dc06-0942), 2006-11-27
Supplement: pg2701onlineappendix.doc [file pg2701onlineappendix.doc]

Ms # DC 06-0942R

Appendix (for on-line publication only).

List of the investigators participating in the Metascreen Study.

A. Aglialoro, Villa Scassi Sampierdarena (GE). D. Agrimi, AUSL BR 1 e LE 2 (BR). V. Aiello, Studio Diabetologico (PA). P. Alessi, Serv. di Diabetologia Terr. AUSL 8 Siracusa (SR). A. Amodeo, Amb. di Diabetologia ASL 11 Villa S. Giovanni (RC). L. Amoresano, Amb. di Diabetologia - Osp. Giussano (MI). M. Andreani, S.I.T di Diabetologia e Malattie Metaboliche-Urbino (PU). R. Andreini, Centro Antidiabetico Osp. Lotti-Pontedera (PI). R. Anichini, Sezione Diabetologia (PT). F. Baccetti, Serv. di Diabetologia AUSL 1 Massa e Carrara (MS). F. Bagnato, Centro Diagnosi e Cura Malattie Metab. Osp. Pugliese Ciaccio (CZ). G. Barba, Ambul. di Diabetologia UO Med. Int. - Osp. Ninetto Melli-S.Pietro V. (BR). E. Bassi, Centro Antidiabetico di Pieve di Coriano (MN). A. Basso, CAD (VI). M. Belotti, Centro Diabetologico - Azienda Mellino Mellini (BS). A. Belviso, Amb. Diabetologico Ponte S. Pietro (BG). S. Bertaina, UOA di Diabetologia ASL 1 (TO). E. Boldrini, Centro Antidiabetico Clin. Med. II - Osp. Santa Chiara (PI). D. Bonfiglioli, UONA di Diabetologia ASL 13 (NO). L. Bonisolli, Amb. di Diabetologia S. Raffaele (MI). L. Bortolato, Centro Antidiabetico - PO Mirano (VE). M. Boschetti, Dip. di Scienze Endocrinologiche e Metaboliche - Università (GE). C. Bovè, Serv. di Diabetologia Terr. ASL 4 (TR). F. Brogna, ASL 3 (TO). M. Cairo, Ospedale "S. Famiglia"-Erba (CO). G. Candotti, Centro per la Cura del Diabete e delle Malattie Metab.-Seregno (MI). L. Capretti, Centro Ambulat. di Diabetologia e M.Metaboliche Endocrinologia -Codogno (LO). A. Carbone, Ambul. Privato-Codogno (LO). C. Carpinelli, Centro Antidiabetico, Osp. "S.Luca"-Vallo della Lucania (SA). G. Casali, Ospedale Vaprio D'Adda (MI). M. Cianciullo, Amb. di Diabetologia, Osp. "A.Tortora"-Pagani (SA). A. Cocca, Osservatorio di Diabetologia-Morcone (BN). W. Colosio, Ospedale Chiari (BS). E. Contrino, Ospedale S. Raffaele Resnati (MI). G. Cordaro, Ambul. di Diabetologia-Ramacca (CT). G. Cozzolino, CAD Spes (NA). C. Crisafulli, Amb. di Diabetologia c/o Medicina 2 AORN "Garibaldi" (CT). R. Custureri, Dip. Diabetologico - U.O. Cl. Gerontologica (GE). M. Cutolo, CAD Ottaviano ASL NA 4 (NA). M. Daguati, Poliamb. ASL - Corteolona (PV). F. Dalpane, Centro Antidiabetico di Ferrara (FE). M. D'Apote, Centro Ercolani (BO). A. Davalli, Ospedale San Raffaele (MI). D. D'Avanzo, Amb. di Diabetologia ASL 5 - Rivoli e Collegno (TO) .M. De Cicco, Centro Antidiabetico A.C.I.S.M.O.M.-Andria (BA). C. De Francesco, Studio Medico (ME). U. De Joannon, U.O. Diabetologia - Osp. da Saliceto (PC). A. Delrio, Centro per il Diabete dell'Adulto (GE). S. Di Lembo, Amb. di Diabetologia - Osp. San Giuseppe (MI). A. Di Piazza, Amb. Medicina Interna - Polic. Centro (PA). E. Di Timoteo, Serv. di Diabetologia Ospedale Sanremo (IM). G. Drago, Unità Renale & Mal. Dismetaboliche-Dolo (VE). O. Egione, ASL NA 1 Do. 49 (NA). P. Elli, U.O. Diabetologia (CO). G. Fabbrini, Serv. Diabetologia e Mal. Metaboliche AUSL Roma F-Ospedale (RM). F. Farina, UONA di Diabetologia ASL 13-Borgomanero (NO). N. Festa, Serv. Specialistico Diabetologico Distrettuale (FG). G. Filippo, Osp. di Tione (TN). F. Folli, Ospedale San Raffaele (MI). L. Franco, Poliamb. AUSL FG 2-Margherita di Savoia (FG). I. Franzetti, U.O. di Diabetologia (VA). G. Gadaleta, Amb. di Diabetologia - Cittiglio (VA). F. Galeone, Serv. di Diabetologia-Pescia (PT). D. Gallo, A.S.L. 6 Ciriè (TO). G. Galluzzo, ASL AG 1 - Cammarata (AG). B. Garimberti, AO Osp. Civile di Legnano (MI). C. Gazzaruso, IRCCS Fondazione Maugeri (PV). R. Gelisio, Serv. di Diabetologia di Portogruaro (VE). F. Gentile, Serv. di Endocrinologia - Azienda BA 4 (BA). L. Gentile, Soc. Malattie Metab. e Diabetologia (AT). V. Gherardini, Diabetologia di Piombino (LI)

C. Giacchetto, Poliamb. ASL 2 CL (CL). S. Giardina, Centro Diabetologico (AO). A. Girelli, U.O. Diabetologia - Spedali Civili Brescia (BS). M. Grimaldi, U.O. Diabetologia - Policlinico S.Orsola (BO). U. Grimaldi, PO S.Giovanni di Dio-S. Agata de Goti (BN). P. Guidi, Amb. di Diabetologia-Latisana (UD). R. Guidi, U.O. di Diabetologia INRCA (AN), F. Ignazio, Centro Antidiabetico Osp. di Casarano (LE). M. Infante, Amb. di Diabetologia e Medicina Interna - Osp.S.M.della Speranza (SA). A. Ioviro, AID Nola (NA). G. Laffi, Centro Antidiabetico S.Orsola (BO). M. Lanero, Serv. di Diabetologia-Osp. Acqui Terme (AL). S. Lanzafame, ASL 3 Centro di Diabetologia (CT). F. Lasaracina, Amb. Diabetologico-Ospedale S. Pietro (RM). G. Leccia, A.F.A. di Diabetologia, ASL CE 2 PO S.G. Moscati-Aversa (CE). C. Lencioni, Centro delle Malattie del Metabolismo e Diabetologia (PI). G. Leonardi, Amb. Diabetologico - PO di Giarre USL 3 (CT). C. Leotta, Studio Medico Diabetologico-Giarre (CT). G. Lepore, U.O. di Diabetologia (BG). C. Lieto, Serv. di Diabetologia Distretto 71 ASL NA 4-Pomilgiano d'Arco (NA). G. Lo Piparo, Amb. di Diabetologia-Bagheria (PA). M. Loragno, Centro Antidiabetico Territ., USL BA 2-Bagheria (BA). A. Macchia, Ambul. di Endocrinologia - AUSL Tricase (LE). A. Maccioni, Servizio di Diabetologia, Osp. Civile Conegliano (TV). B. Macerola, Serv. di Diabetologia - PO S.Salvatore, Amb. Medico (AQ). R. Maiorana, Centro di Diabetologia Dip. Endocr. - Presidio Osp. Garibaldi (CT). M. Malighetti, Poliamb. Terr. - A.O. L.Sacco (MI). G. Mangione, Studio Mangione (PA). A. Marchegiani, Centro per il Diabete dell'Adulto (GE). M. Masella, A.F.A. di Diabetologia, ASL CE 2 PO S.G. Moscati-Aversa (CE). C. Massaroli, Centro di Diabetologia - Merate (LC). L. Matera, Centro Antidiabetico A.C.I.S.M.O.M.-Andria (BA). G. Mazziotti, Poliamb. S.Giovanni in Fiore (CS). G. Memoli, Centro Antidiabetico "San Luca"-Adriano Irpino (AV). E. Migliaro, Serv. di Diabetologia DSB 48 ASL NA 1 (NA). R. Mingardi, CAD Sandrigo e Noventa (VI). F. Monacelli, Centro per il Diabete dell'Adulto (GE). G. Morandi, Centro Antidiabetico Osp. S. Antonio Abate-Gallarate (VA). R. Morea, Serv. di Diabetologia e Malattie Metab. - Osp. "Madonna delle Grazie" (MT). F. Morelli, Centro Antidiabetico Osp. Campostaggia (SI). M. Mori, Serv. di Diabetologia Massa (MS). G. Mornighi, Amb. Diabetologico, Ospedale "M. Marini"-Magliano S. (RI). A. Natale, Dip. Diabetologico, U.O. Clinica Gerontologica (GE). A. Nicoletti, Centro Antidiabetico, Osp. "S.Luca"-Vallo della Lucania (SA). C. Noacco, U.O. di Diabetologia e Mal. Metaboliche (UD). A. Nogara, Centro Antidiabetico di Chioggia (VE). R. Norgiolini, Centro Antidiabetico ASL 1-Città di Castello (PG). G. Nunziata, Amb. di Diabetologia-Marigliano (NA). D. Oliva, Ambul. di Diabetologia - ASL 9 (TP). G. Panebianco, U.O.S. di Diabetologia Dip. Medico - Osp.Civ. Monselice (ULSS 17) (PD). D. Pantaleo, Studio Medico-Nardò (LE). D. Paolucci, Studio Medico (RM). M. Pascuzzo, ASL 4 (TO). C. Pentangelo, Centro Antidiabetico Distretto 60, ASL NA 2-Marano di Napoli (NA). G. Perrone, Serv. di Diabetologia - Polo Sanitario Reggio Sud (RC). G. Pettine, Centro di Diabetologia "G.C.Torri" (SO). V. Piccinelli, Osp. Mauriziano di Valenza (AL). C. Piersanti, Serv. di Diabetologia - Osp. di Teramo (TE). G. Pietranera, Serv. di Diabetologia e Malattie Metab. - AUSL RE (RE). A. Pipitone, Ospedale di Adria (RO). F. Pisanò, Amb. di Endocrinologia ASL LE 1 LE 2 (LE). G. Pizzi, Centro di Diabetologia e Mal. Metab.Osp. Niguarda Cà Granda (MI). S. Pocciati, Centro Diabetologico - Ospedale di Foligno (PG). G. Pozzuoli, Centro Diabetologico ASL CE 1 (CE). L. Puccio, Serv. di Diabetologia - AO "Pugliese" (CZ). P. Putignano, Ospedale S. Gerardo-Monza (MI). A. Quarto, Centro Antidiabetico "Pagliari"-Massafra (TA). A. Quatraro, Centro di Diabetologia - Casa di cura "S.Rita" (TA). M. Raffa, Serv. di Diabetologia (IM). E. Rastelli, Centro Antidiab. Riccione (RN). M. Rescinito, Amb. Diabetologia - Medicina Ospedale Polla (SA). C. Rognoni, Osp. San Paolo (MI). V. Romanazzi, Casa di Cura "La Madonnina" (BA). R. Roncoroni, Ospedale di Vimercate (MI). A. Rosatello, Serv. di Diabetologia ASL 18-Alba (CN). M. Rosco, Centro Special. Cura del Diabete (BA). E. Rosselli, Centro Sanitario EUR (RM). A. Rossitto, Amb. di Diabetologia, Ospedale G. di Maria-Avola (SR). S. Rovelli, H. Gravedona (CO). A. Saibene, Ospedale San Raffaele (MI). A. Salomoni, Centro Antidiabetico - Osp. Voghera (PV). M. Sambataro, CAD Bassano del Grappa ULSS 3 (VI). G. Santantonio, A.S.L. RM 7, Osp. San Paolo, Amb. Diabetologia-Civitavecchia (RM). F. Santilli, Serv. Ospedaliero di Diabetologia - Ospedale Clinicizzato "S.S. Annunziata" (CH). S. Scarcella, U.O. Endocrinologia - Osp. "Vito Fazzi" (LE). E. Schirru, CAD di Camposampiero - Osp. Civile (PD). R. Serra, Serv. di Diabetologia e Malattie Metab. (LE). S. Settembrini, Centro Diabetologico Distretto 46 ASL NA 1 (NA). N. Simioni, Serv. di Diabetologia - Cittadella (PD). G. Smeraglia, Serv. di Medicina Interna PO E. Albanese (PA). A. Staglianò, ASL Corigliano Calabro (CS). G. Stasio, Centro Diabetologico ASL CE 1-Maddaloni (CE). R. Sturaro, Serv. di Diabetologia Ospedale Sanremo (IM). F. Tanzarella, Ospedale di Ostuni (BR). G. Testa, Serv. di Diabetologia Osp. Portuense (RM). S. Testero, Amb. di Diabetologia ASL (MI). B. Tizio, Centro Diabetologico - Ospedale Eboli (SA). P. Tomaiuolo, Ambul. di Diabetologia, Osp. S.Camillo De Lellis-Manfredonia (FG). F. Tomasi, Serv. di Dietologia e Nutrizione Clinica - A.O. Univ. Arcispedale S. Anna (FE). D. Ugolotti, Amb. Diabetologia Cattedra di Endocrinologia (PR). T. Valenti, Studio Diabetologico (TP). C. Valsecchi, Ospedale Maggiore (CR). M. Veglio, U.O.A. MMD - Osp. Evangelico Valdese (TO). R. Vitale, Amb. di Medicina Interna-Carini (PA). M. Zappacosta, Amb. di Malattie Metaboliche (PE). P. Ziller, Serv. di Diabetologia - Cles (TN)
